# Supplementary material for: Modeling water balance using the Budyko framework over variable timescales under diverse climates
Source: Copernicus journal article supplement (doi:10.5194/hess-2017-441), 2017-08-25
Supplement: Supplementary file [file hess-2017-441-AC1-supplement.pdf]

Dear Referee #1,

Thank you very much for the constructive comments concerning our manuscript entitled “Modeling water balance using the Budyko framework over variable timescales under diverse climates” (Manuscript No.: hess-2017-441). Your comments to our manuscript are all valuable. We have studied carefully and incorporated all of them into our revised manuscript. The point-to-point responses to your comments are given below.

\*\*\*\*\*

**Comments from Anonymous Referee #1:**

The aim of the study is to investigate the suitability of the Budyko framework under different timescales. It seems tempting to apply the simple Budyko model outside the steady state conditions, which are required to derive the water and energy limits; and many authors tried this (Zhang et al., 2008 J.Hydrol., Chen et al., 2013 WRR, Zeng and Cai 2014,2015, Greve et al., 2016 HESS, ...). The application at seasonal time scale requires modelling of water storage - which cannot be measured. Therefore the authors use model output from a land surface model to evaluate the Budyko model. After reading this - it is only mentioned in section 2 - I was tempted to reject the paper right away. This means the whole study is a simple model to model comparison study without even an assessment of the model output with real data. The authors evaluate the model response of 14 large river basins but again only with the model output. The authors find what other have found as well, at shorter timescale model complexity must be larger. Yet, one finding which I find indeed interesting, is that there seems to be a relationship with the variability in water storage change and the error of using a simple Budyko type of model, shown in Figure 11. That means the larger the water storage changes in a catchment the larger the error using Budyko. Additional analysis on why this is case would be of interest, but is not provided. I guess it follows the reasoning of Zeng and Cai 2015 GRL highlighting the role of terrestrial water storage changes on ET.

**Response:** Thank you for all the constructive comments. In this study, we investigated the suitability of the Budyko model (BM) at various timescales in 14 major basins in China based the VIC model output data.

We recognize that there are several previous studies related to examine the effect of water storage change (*WSC*) using the Budyko framework. In fact, our study differs from those previous studies in the following aspects: (1) we test the application of the BM at diverse climates (arid and humid climates) with a very wide range of the aridity index, and address the important question regarding the accuracy of BM when applied to different climates (2) we provide quantitative assessment of the influence of *WSC* on the performance of BM under both arid and humid climates; (3) we use the entire China comprising 14 large river basins as our study regions.

I believe the manuscript must be improved in several ways to be of scientific significance.

1. First is to state right from the beginning that model output is being used to evaluate the Budyko model.

**Response:** Thank for your comment. Following your suggestions, we have stated clear at the beginning of our revised manuscript (Abstract and Introduction) on using model output data for evaluating the Budyko framework.

2. Second is to use actual runoff data of the large river basins to evaluate the Budyko model. Aggregated land surface model output is not very useful to my mind.

**Response:** Thank for your comment. In this study, we assessed the application of the Budyko model (BM) at five various timescales (mean-annual, annual, dry-season, wet-season and monthly) in 14 major river basins in China based on the output data of the VIC model. According to Zhang et al (2014), the VIC model has been calibrated and validated in the 11 major river basins of China based on the observed hydrologic data of 15 hydrologic stations. The model parameters were estimated by using the optimization algorithm of the multi-objective complex evolution of the University of Arizona (MOCOM-UA). The results indicated that the simulated monthly runoff matches well with observations - the Nash–Sutcliffe efficiency is larger than 0.8 at 11 out of the total 15 stations, and the relative error is less than 25% at 13 out of 15 stations. Only for the stations at the Tibetan Plateau of western China, there are relatively large errors in hydrologic simulation due to lack of data with sufficiently reliable quality. In addition, the VIC-simulated evapotranspiration ( $E$ ) was compared well with a global product of  $E$  based on the multi-sensor remote sensing ( $RS$ ) data with the relative difference less than 25% over the most areas of China, and the relative bias of  $E$  averaged over the entire China is only  $-4\%$ , indicating satisfactory simulation of  $E$  by VIC over China.

In our study, the BM was applied at five different timescales, namely, the mean-annual, annual, dry- and wet-seasonal, and monthly timescales. At the mean-annual scale, the data of precipitation ( $P$ ), runoff ( $R$ ), and potential evapotranspiration ( $PET$ ) are used to fit the Fu's equation ( $(P-R)/P$  vs.  $PET/P$ ) assuming that water storage change ( $WSC$ ) is negligible at the mean-annual timescale. However, at the annual and even finer timescales, the VIC-simulated evapotranspiration ( $E$ ) data are used to fit the Fu's equations instead of using ( $P-R$ ), thus the effects of  $WSC$  is considered. In assessing the original BM, the VIC-simulated  $R$  was only used at the mean-annual timescale, but in the extended BM the effective  $P$  is calculated as  $P - WSC = P - (P - E - R) = E + R$ . Therefore, VIC-simulated  $E$  and  $R$  are both used to fit the extended BM at the annual and finer timescales.

We recognize that the use of modeling data may introduce uncertainty into the assessment of BM. However, we were unable to find observed runoff (streamflow) data in the 14 river basins considered due to the general difficulty in acquiring Chinese streamflow data, which are confidential materials only kept by government authorities. Also, there is generally a lack of a long-term observed runoff data in the west large basins of China (e.g., Xinjiang and Hexi).

However, following your review comments, we made efforts to obtain observed streamflow data at 14 hydrologic stations (as plotted and summarized in Figure S1 and Table S1) located at 7 large river basins of China (i.e., the Southeast Drainage, Southwest Drainage, Yangtze, Yellow, Huaihe, Heilongjiang, and Liaohe basin), with the drainage areas ranging from  $19.1 \times 10^3$  to  $1705.4 \times 10^3$  km<sup>2</sup>. Based on these observed streamflow data at 14 sub-basins, we conducted an assessment of the

performance of BM and extended BM at the annual and monthly timescales (Table S2). As shown in Table S2, the performance of BM decreases when moving from arid to humid basins at all four timescales. In general, the BM predicts a reasonably well  $E$  for most arid basins (e.g., from Haerbin to Tieling) at the annual, dry-seasonal, and monthly timescales, with the  $CE$  ranging between 0.56~0.95 and the  $RE$  between -4.60%~2.43%. In contrast, a poor performance is found in the relatively humid basins, particularly at the wet-seasonal timescale where  $CE$  is generally negative. When  $WSC$  is incorporated into BM (by replacing  $P$  with effective  $P$ ), the improvement is found in arid basins, but to a lesser extent in humid basins (e.g., Chaoan, Gaoyao and Datong). For example, at the monthly timescale both BM and extended BM underestimate  $E$  at almost all the basins, and this underestimation is more serious for the extended BM. In addition, for the Wujiadu station in the Huaihe basin, both BM and extended BM cannot well reproduce the variability of  $E$  ( $CE$  is small or negative), which is similar to the finding in the Huaihe basin by the VIC-simulated data. Overall, the results of the assessment of BM and extend BM with the observed runoff data at the 14 sub-basins are consistent with the results obtained from the assessment with the VIC-simulated runoff data.

Following your comments, we add two sub-sections in our revised manuscript for assessing the water balance modeling of the Budyko framework with (1) the VIC-simulated runoff data (section 3.1) and with (2) the observed runoff data at the 14 sub-basin hydrologic stations (section 3.2).

#### Reference

Zhang, X., Tang, Q., Pan, M., Tang, Y., 2014. A Long-Term Land Surface Hydrologic Fluxes and States Dataset for China. *J. Hydrometeor.* 15, 2067–2084, doi: 10.1175/JHM-D-13-0170.1.

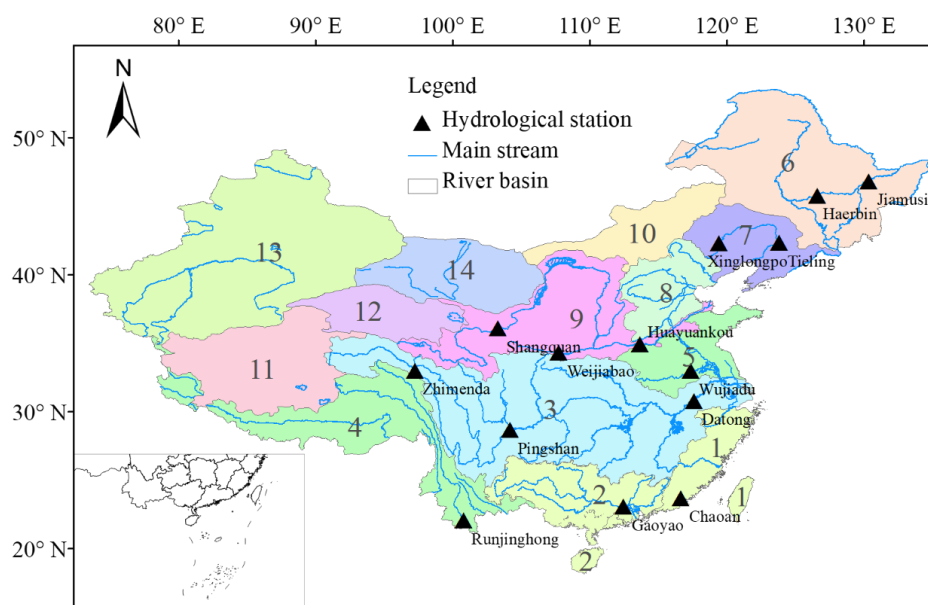

Figure S1. Locations of the 14 large river basins in China and the associated 14 sub-basin hydrological stations: 1, Southeast Drainage; 2, Pearl River; 3, Yangtze River; 4, Southwest Drainage; 5, Huaihe River; 6, Heilongjiang River; 7, Liaohe River; 8, Haihe River; 9, Yellow River; 10, Inner Mongolia River; 11, Qiangtang River; 12, Qinghai River; 13, Xinjiang River, 14, Hexi River.

Table S1. List of the 14 sub-basin hydrologic stations.

| Name        | Basin              | Drainage area (km <sup>2</sup> ) | Lat (° N) | Lon (° E) | Period    | Aridity index |
|-------------|--------------------|----------------------------------|-----------|-----------|-----------|---------------|
| Chaoan      | Southeast Drainage | 29077                            | 23.67     | 116.65    | 1980-2008 | 0.55          |
| Gaoyao      | Southeast Drainage | 351535                           | 23.05     | 112.47    | 1980-2008 | 0.69          |
| Datong      | Yangtze            | 1705383                          | 30.78     | 117.61    | 1980-2008 | 0.82          |
| Wujiadu     | Huaihe             | 121330                           | 32.96     | 117.38    | 1980-2008 | 1.05          |
| Yunjinghong | Southwest Drainage | 141779                           | 22.03     | 100.79    | 1980-2007 | 1.15          |
| Jiamusi     | Heilongjiang       | 528277                           | 46.82     | 130.37    | 1981-2002 | 1.36          |
| Pingshan    | Yangtze            | 485099                           | 28.64     | 104.17    | 1980-2008 | 1.37          |
| Haerbin     | Heilongjiang       | 390526                           | 45.77     | 126.59    | 1981-2002 | 1.48          |
| Weijiabao   | Yellow             | 37037                            | 34.29     | 107.73    | 1980-2008 | 1.83          |
| Shangquan   | Yellow             | 182821                           | 36.07     | 103.30    | 1987-2007 | 1.93          |
| Zhimenda    | Yangtze            | 137704                           | 32.99     | 97.25     | 1980-2008 | 2.24          |
| Huayankou   | Yellow             | 730036                           | 34.91     | 113.67    | 1980-2007 | 2.54          |
| Xinglongpo  | Liaohe             | 19100                            | 42.32     | 119.43    | 1980-2008 | 2.56          |
| Tieling     | Liaohe             | 120800                           | 42.33     | 123.84    | 1992-2007 | 2.61          |

Table S2. Statistics on performance of the original BM (O-BM) and extended BM (E-BM) in water balance modeling for the 14 hydrological stations at four different timescales.

| No. | Stations    | Annual    |       | Dry season    |       |           |       | Wet season    |       |           |       | Month         |        |           |      |               |        |
|-----|-------------|-----------|-------|---------------|-------|-----------|-------|---------------|-------|-----------|-------|---------------|--------|-----------|------|---------------|--------|
|     |             | <i>CE</i> |       | <i>RE (%)</i> |       | <i>CE</i> |       | <i>RE (%)</i> |       | <i>CE</i> |       | <i>RE (%)</i> |        | <i>CE</i> |      | <i>RE (%)</i> |        |
|     |             | O-BM      | E-BM  | O-BM          | E-BM  | O-BM      | E-BM  | O-BM          | E-BM  | O-BM      | E-BM  | O-BM          | E-BM   | O-BM      | E-BM | O-BM          | E-BM   |
| 1   | Chaoan      | -0.22     | -0.58 | 0.06          | 0.50  | 0.08      | 0.46  | 7.77          | -3.04 | -0.75     | -0.65 | -1.87         | -1.50  | 0.79      | 0.50 | -8.28         | -25.39 |
| 2   | Gaoyao      | 0.02      | 0.08  | -0.05         | -0.12 | 0.65      | 0.53  | 0.35          | -0.18 | -2.79     | -2.79 | -4.68         | -4.69  | 0.74      | 0.61 | -14.20        | -23.33 |
| 3   | Datong      | 0.66      | 0.51  | -0.09         | -0.01 | 0.42      | 0.36  | 0.31          | 0.14  | 0.41      | 0.38  | -0.33         | -0.26  | 0.75      | 0.67 | -15.98        | -20.93 |
| 4   | Wujiadu     | -0.70     | -0.52 | 1.08          | 0.92  | -2.33     | -0.88 | 2.39          | 1.02  | -8.67     | -8.28 | -13.24        | -12.45 | 0.65      | 0.68 | -13.66        | -24.61 |
| 5   | Yunjinghong | 0.38      | 0.64  | -0.02         | 0.03  | 0.23      | 0.64  | 0.36          | -0.02 | 0.09      | 0.49  | -0.07         | -0.20  | 0.94      | 0.71 | -0.39         | -20.63 |
| 6   | Jiamusi     | 0.83      | 0.06  | -0.19         | 0.05  | 0.83      | 0.42  | 0.08          | -0.07 | -0.18     | -1.05 | -4.33         | -2.76  | 0.96      | 0.88 | 0.37          | -11.88 |
| 7   | Pingshan    | 0.40      | 0.57  | 0.05          | 0.11  | 0.08      | 0.61  | 0.30          | 0.05  | 0.23      | 0.61  | 0.02          | -0.06  | 0.98      | 0.69 | 1.19          | -24.74 |
| 8   | Haerbin     | 0.89      | 0.16  | -0.15         | 0.05  | 0.85      | 0.51  | 0.20          | -0.10 | 0.01      | -0.86 | -4.12         | -2.41  | 0.95      | 0.87 | -0.13         | -13.42 |
| 9   | Weijiabao   | 0.78      | 0.76  | 0.28          | 0.21  | 0.78      | 0.76  | 0.28          | 0.21  | -         | -     | -             | -      | 0.93      | 0.97 | -4.51         | -4.06  |
| 10  | Shangquan   | 0.75      | 0.63  | 0.06          | -0.03 | 0.75      | 0.63  | 0.06          | -0.03 | -         | -     | -             | -      | 0.96      | 0.65 | -4.60         | -27.84 |
| 11  | Zhimenda    | 0.56      | 0.86  | 0.23          | 0.06  | 0.56      | 0.86  | 0.23          | 0.06  | -         | -     | -             | -      | 0.95      | 0.84 | 2.43          | -20.79 |
| 12  | Huayuankou  | 0.83      | 0.84  | 0.05          | 0.04  | 0.83      | 0.84  | 0.05          | 0.04  | -         | -     | -             | -      | 0.97      | 0.89 | -3.78         | -14.22 |
| 13  | Xinglongpo  | 0.72      | 0.92  | 0.33          | 0.00  | 0.72      | 0.92  | 0.33          | 0.00  | -         | -     | -             | -      | 0.93      | 0.99 | -2.02         | -0.21  |
| 14  | Tieling     | 0.82      | 0.95  | 0.22          | 0.00  | 0.82      | 0.95  | 0.22          | 0.00  | -         | -     | -             | -      | 0.95      | 0.99 | -4.29         | 2.44   |

3. Third is an proper statistical assessment of the statement, that the Budyko models works better in arid than in humid areas.

**Response:** Thank for your comment. According to McVicar et al. (2012), the grids over China are classified into three cases: the energy-limited (humid) areas (aridity index  $< 0.76$ ), the water-limited (dry) areas (aridity index  $> 1.35$ ), and the intermedium areas ( $0.76 < \text{aridity index} < 1.35$ ). According to your suggestions, we conducted a comparison of the cumulative distribution function (CDF) of the Coefficient of Efficiency ( $CE$ ) and the Relative Error ( $RE$ ) in the humid and dry grids over China at the annual, dry season, wet season, and monthly timescales. As shown in Figures S2 and S3, there are large systematic differences in the  $CE$  and  $RE$  of the BM between the humid and dry areas. Given a fixed  $CE$  within the range from 0 to 1, the CDF is significantly larger in humid areas than in dry areas at all four timescales, especially at the annual and dry season scales. Given a fixed  $RE$ , the CDF is smaller in humid areas than in dry areas at the annual, dry-season and monthly scales (except for the wet-season scale). These results indicate that the BM works better in the arid than in humid areas at the annual, dry-season, and monthly timescales. According to your suggestion, in the revised manuscript we added a new subsection (section 3.3) within the Results section to make a comparison of the model performance in humid and arid regions.

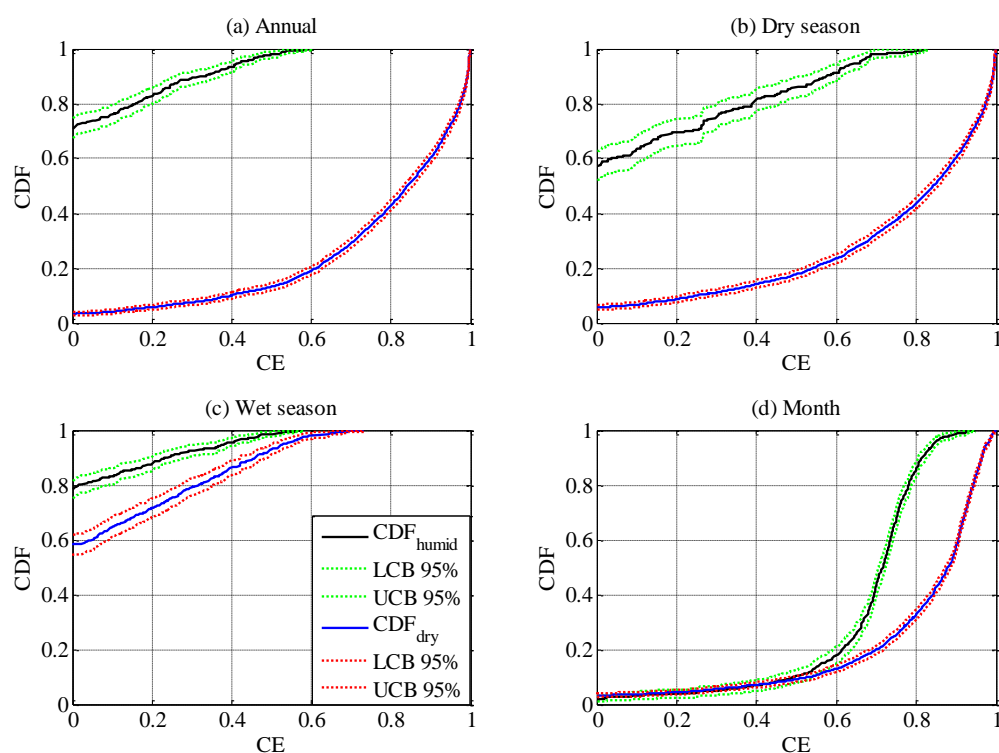

Figure S2. The cumulative distribution function (CDF) of  $CE$  in the humid grids (with the aridity index  $< 0.76$ ) and the dry grids (with the aridity index  $> 1.35$ ) at the (a) annual, (b) dry-season, (c) wet-season, and (d) monthly timescales. Dotted lines represent 95% confidence intervals.

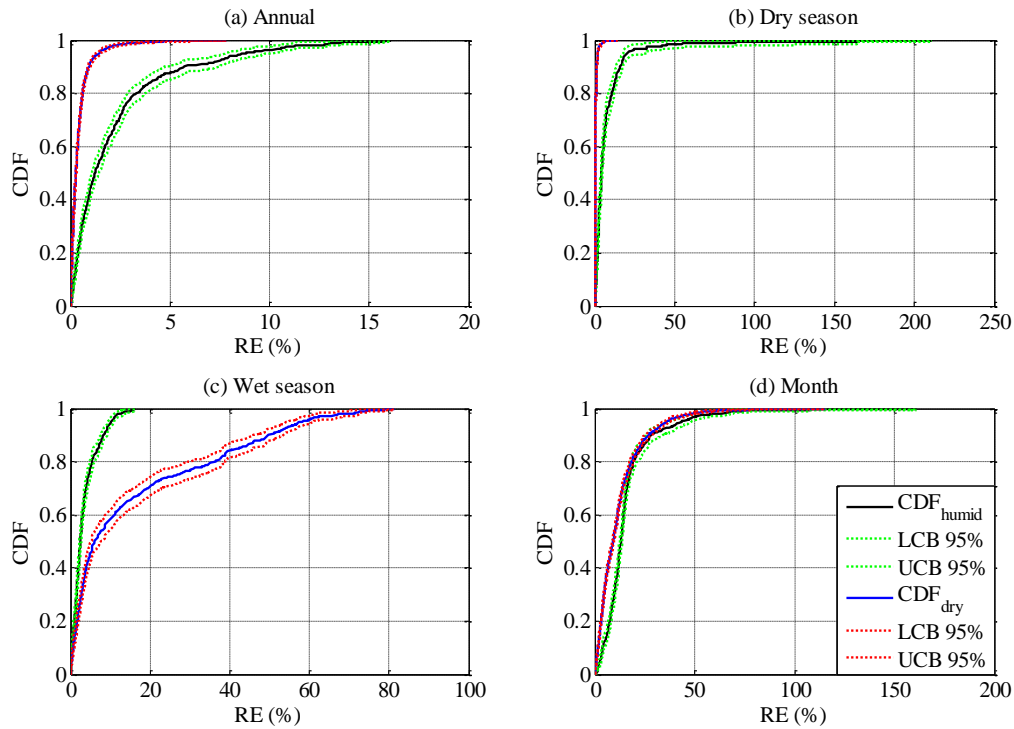

Figure S3. The cumulative distribution function (CDF) of the absolute values of  $RE$  (%) in the humid grids (with the aridity index  $< 0.76$ ) and the dry grids (with the aridity index  $> 1.35$ ) at the (a) annual, (b) dry-season, (c) wet-season, and (d) monthly scales. Dotted lines represent 95% confidence intervals.

Reference:

McVicar, T.R., Roderick, M.L., Donohue, R.J., Van Niel, T.G., 2012. Less bluster ahead? Ecohydrological implications of global trends of terrestrial near-surface wind speeds. *Ecohydrol.* 5, 381–388, doi: 10.1002/eco.1298.

4. the number of figures must be reduced. Some figures may be put into a supplement. One should select one timescale of the type of figures shown in Figures 4-10. Then a table of relevant statistics can be used instead.

**Response:** Thank for your comment. According to your suggestions, we have reduced 8 figures (e.g., the original Figures 5-10 and Figures 12 and 13). Two tables summarizing relevant statistics are used to replace the original Figures 5-10 in the revised manuscript.

5. Figures 11-13 show the same data with different ratios. I recommend to use Fig 11 and cut the remaining ones.

**Response:** Thank for your comment. We have removed the original Figures 12 and 13 and only keep the original Figure 11 in the revised manuscript.

6. Use a better color scaling of the points such that the points get sufficiently different in color.

**Response:** Thank for your comment. We have revised it.

7. Use similar x and y scales in the panels of a Figure to allow fair visual comparison.

**Response:** Thank for your comment. We have revised it.

8. The discussion is rather a results section. Move the sections 4 to results. In the discussion please argue why the variability in water storage affects the model performance. Why the Budyko model is better in arid catchments. Please include and discuss your findings with the ones from the literature.

**Response:** Thank for your comment. According to your suggestion, we have moved the Section 4 to the Results section in the revised manuscript. In the Discussion section, we focused on the following two issues: (1) why the Budyko model performs better in the arid catchments? and (2) how the variability in the water storage affects model performance? Meanwhile, we also provide discussion on the comparison of our findings with previous studies in literature.
